# Supplementary material for: Sulfated Chinese yam polysaccharide enhances the immunomodulatory activity of RAW 264.7 cells via the TLR4-MAPK/NF-κB signaling pathway
Source: Royal Society of Chemistry journal article supplement (doi:10.1039/d1fo03630k), 2021-12-30

iNOS (1)

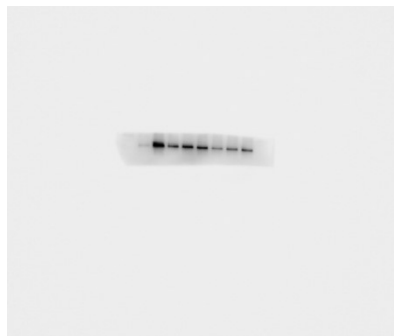

iNOS 2 (2)

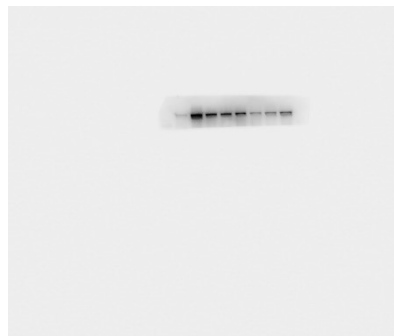

iNOS (3)

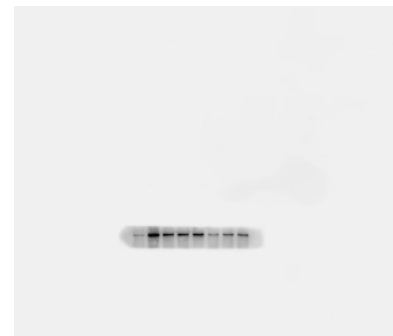

TLR4 (1)

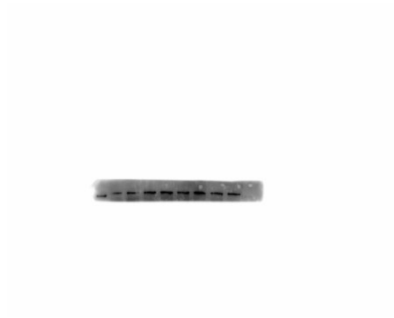

TLR4 (2)

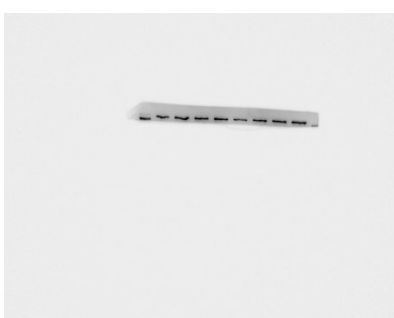

TLR4 (3)

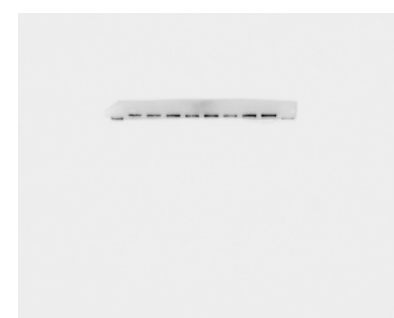

p38 (1)

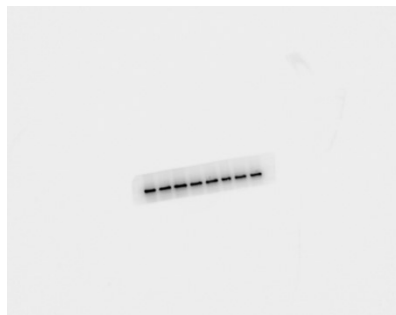

p38 (2)

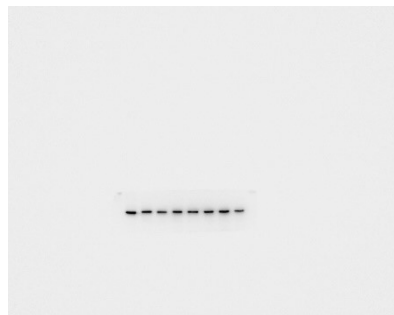

p38 (3)

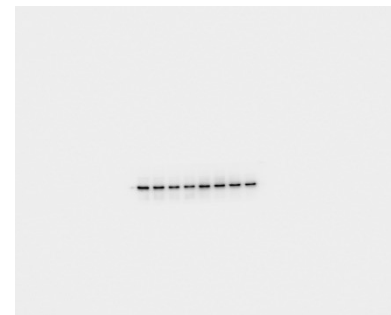

p-p38 (1)

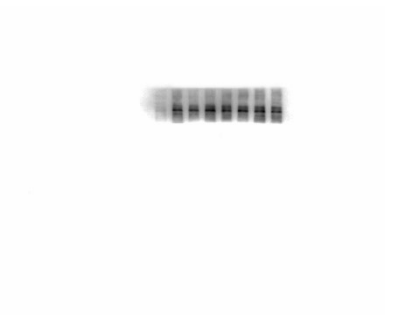

p-p38 (2)

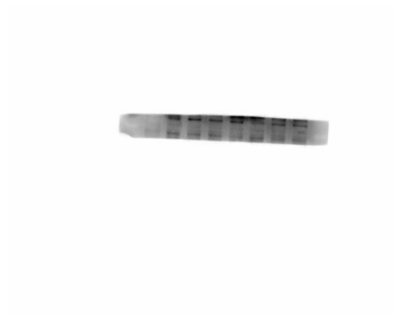

p-p38 (3)

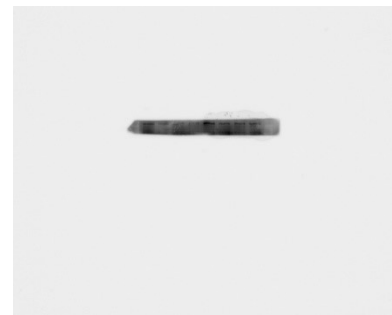

JNK (1)

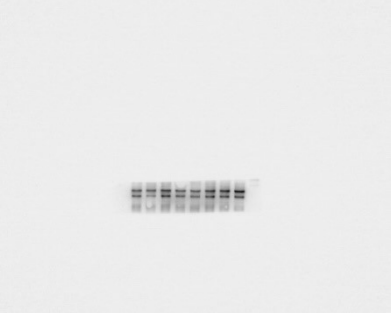

JNK (2)

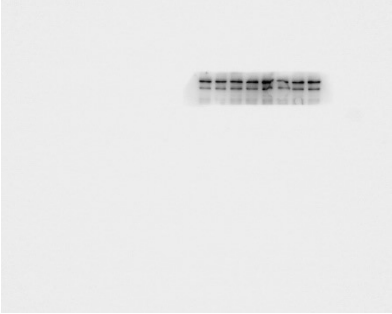

JNK (3)

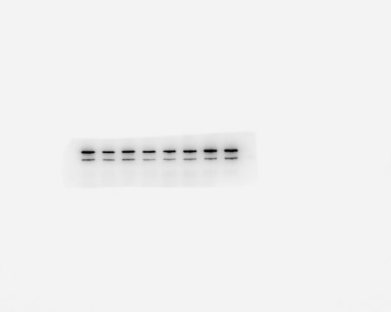

p-JNK (1)

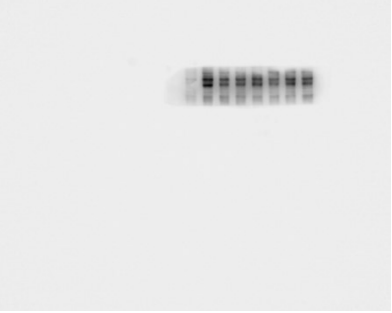

p-JNK (2)

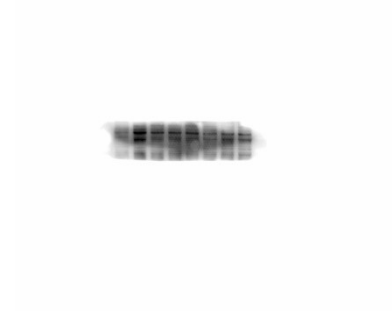

p-JNK (3)

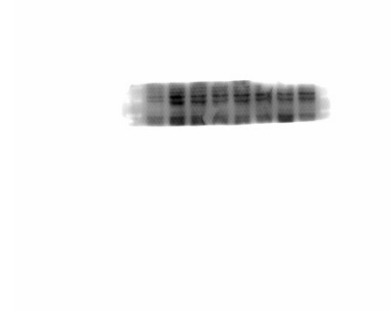

ERK (1)

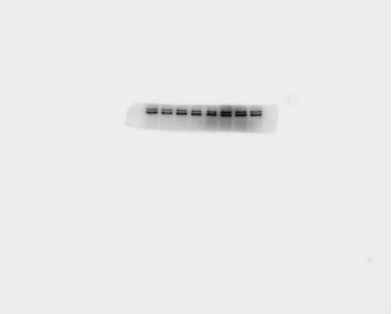

ERK (2)

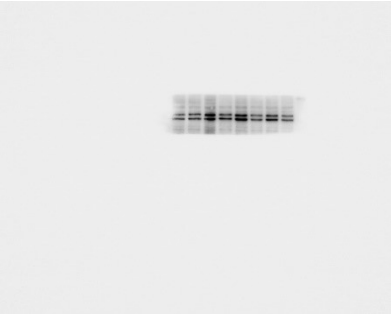

ERK (3)

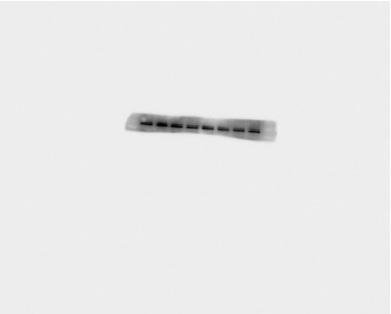

p-ERK (1)

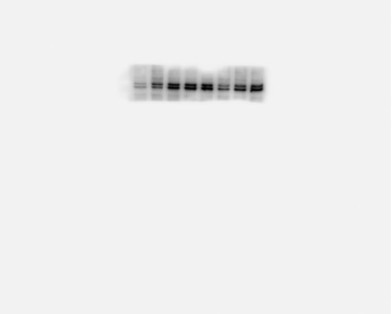

p-ERK (2)

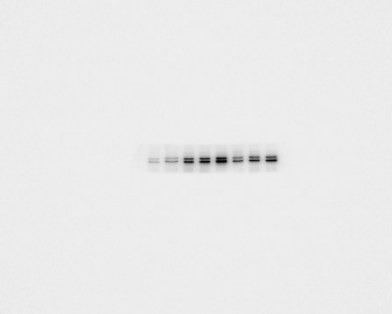

p-ERK(3)

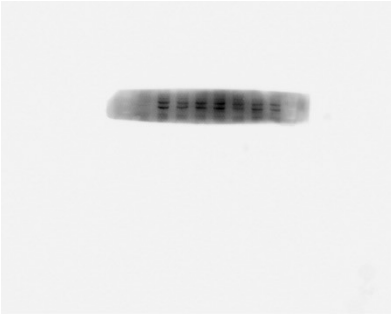

$\beta$ -actin (1)

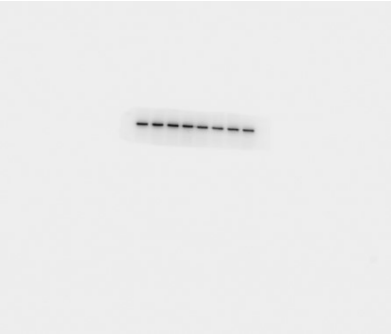

$\beta$ -actin (2)

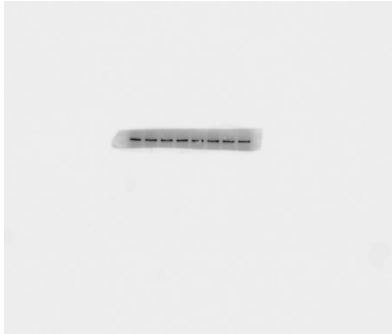

$\beta$ -actin (3)

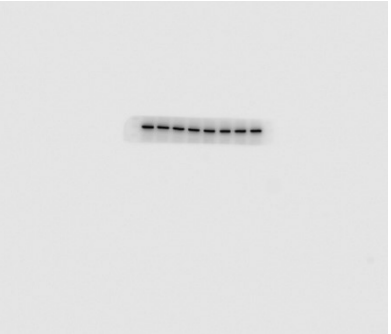

Supplement: d1fo03630k1.pdf [file d1fo03630k1.pdf]
